# Supplementary material
Source: Springer Nature journal article supplement (https://www.springermedizin.de/resource/supplementary/13014_2010_366_MOESM2_ESM.pdf/9633638)

# PSA vs SUVmax

- SUV prostate
- SUV Ln

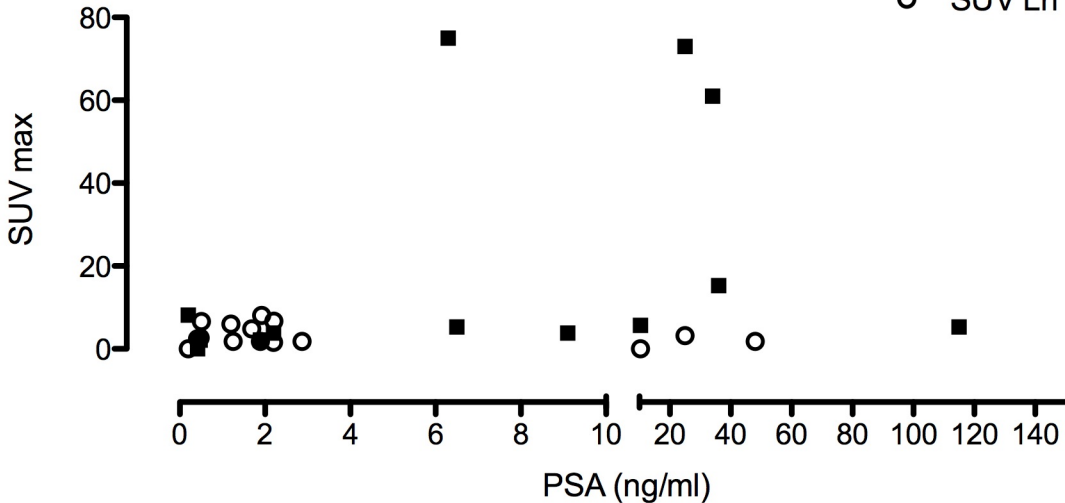

Supplement: MOESM2 [file 9633638]
